# Supplementary material for: Efficacy of orally administered sodium benzoate and sodium phenylbutyrate in dogs with congenital portosystemic shunts
Source: PubMed Central journal article supplement — J Vet Intern Med. 2019 Mar 27;33(3):1331–5. doi: 10.1111/jvim.15477 (PMC6524074; doi:10.1111/jvim.15477), 2019-03-27
Supplement: JVIM-33-1331-s001.pdf [file JVIM-33-1331-s001.pdf]

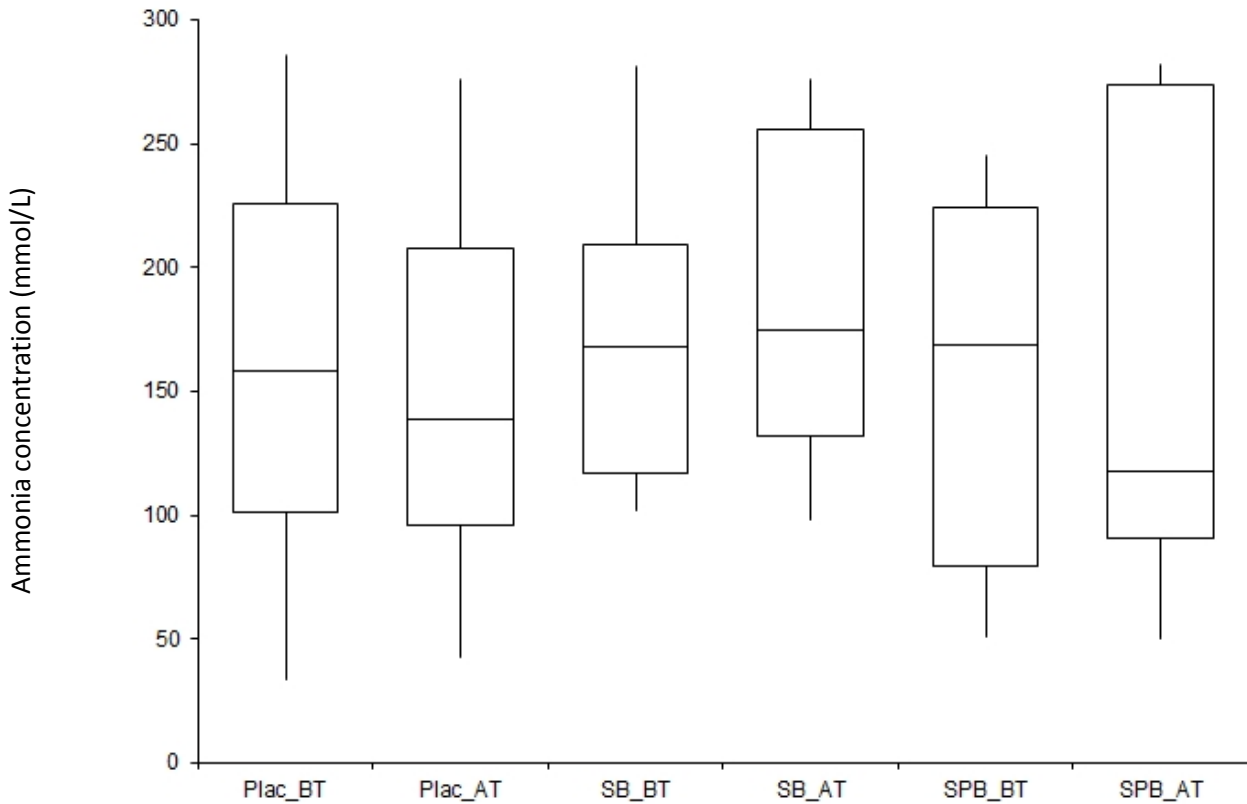

**Supplemental Figure 1. Whisker plot of ammonia concentrations before and after treatments in 10 CPSS dogs.**

Plac; Placebo, SB; sodium benzoate, SPB; sodium phenylbutyrate, BT; before treatment, AT; after treatment. Treatments were each of five-day duration with wash-out periods of three days. Each box and whisker plot illustrates the median (line in the middle), mean (+), 25th and 75th percentiles (top and bottom of each box); whiskers extend from the 5th and 95th percentile values.
