# Supplementary material for: Efficacy of orally administered sodium benzoate and sodium phenylbutyrate in dogs with congenital portosystemic shunts
Source: PubMed Central journal article supplement — J Vet Intern Med. 2019 Mar 27;33(3):1331–5. doi: 10.1111/jvim.15477 (PMC6524074; doi:10.1111/jvim.15477), 2019-03-27
Supplement: JVIM-33-1331-s002.pdf [file JVIM-33-1331-s002.pdf]

**Supplemental Table 1. Ammonia and bile acid concentrations before and after treatments in 10 CPSS dogs.**

|               | Ammonia ( $\mu\text{mol/l}$ ) |     |     |     |     |     | Bile acids ( $\mu\text{mol/l}$ ) |     |     |     |     |     |
|---------------|-------------------------------|-----|-----|-----|-----|-----|----------------------------------|-----|-----|-----|-----|-----|
|               | Placebo                       |     | SB  |     | SPB |     | Placebo                          |     | SB  |     | SPB |     |
|               | BT                            | AT  | BT  | AT  | BT  | AT  | BT                               | AT  | BT  | AT  | BT  | AT  |
| <b>Dog 1</b>  | 112                           | 81  | 188 | 133 | 99  | 85  | 260                              | 280 | 238 | 189 | 333 | 149 |
| <b>Dog 2</b>  | 72                            | 43  | 102 | 123 | 70  | 92  | 235                              | 174 | 370 | 265 | 318 | 348 |
| <b>Dog 3</b>  | 221                           | 184 | 171 | 182 | 245 | 273 | 303                              | 338 | 340 | 285 | 170 | 223 |
| <b>Dog 4</b>  | 171                           | 108 | 109 | 274 | 51  | 50  | 475                              | 365 | 280 | 136 | 320 | 175 |
| <b>Dog 5</b>  | 104                           | 103 | 141 | 140 | 198 | 282 | 313                              | 162 | 565 | 166 | 345 | 198 |
| <b>Dog 6</b>  | 34                            | NA  | 118 | 98  | 80  | 91  | 106                              | NA  | 310 | 248 | 270 | 295 |
| <b>Dog 7</b>  | 146                           | 160 | 165 | 167 | 223 | 103 | 565                              | 390 | 295 | 335 | 360 | 295 |
| <b>Dog 8</b>  | 215                           | 276 | 281 | 254 | 145 | 133 | 190                              | 218 | 278 | 278 | 239 | 105 |
| <b>Dog 9</b>  | 286                           | 254 | 235 | 276 | 239 | 282 | 453                              | 390 | 418 | 385 | 480 | 345 |
| <b>Dog 10</b> | 279                           | 139 | 207 | 223 | 193 | 162 | 131                              | 58  | NA  | 130 | 99  | 161 |
| <b>Mean</b>   | 164                           | 149 | 172 | 187 | 154 | 155 | 303                              | 264 | 344 | 241 | 293 | 229 |
| <b>SD</b>     | 86                            | 78  | 58  | 66  | 74  | 90  | 152                              | 118 | 99  | 85  | 106 | 86  |

SB; sodium benzoate, SPB; sodium phenylbutyrate, BT; before treatment, AT; after treatment.

NA; data not available. Treatments were each of five-day duration with wash-out periods of three days.
